# Supplementary material for: Nationwide survey of Lambert-Eaton myasthenic syndrome in Japan
Source: HighWire-hosted journal article supplement (doi:10.1136/bmjno-2022-000291), 2022-09-01
Supplement: bmjno-2022-000291supp001_data_supplement.pdf [file bmjno-2022-000291supp001_data_supplement.pdf]

**S1 Table. Diagnostic criteria for LEMS**

|                                                                                                     |                                                                                                                                                                                                                                                        |
|-----------------------------------------------------------------------------------------------------|--------------------------------------------------------------------------------------------------------------------------------------------------------------------------------------------------------------------------------------------------------|
| A                                                                                                   | Symptoms                                                                                                                                                                                                                                               |
| 1                                                                                                   | Proximal muscle weakness                                                                                                                                                                                                                               |
| 2                                                                                                   | Autonomic symptoms                                                                                                                                                                                                                                     |
| 3                                                                                                   | Attenuated deep tendon reflex                                                                                                                                                                                                                          |
| B                                                                                                   | Laboratory findings                                                                                                                                                                                                                                    |
| 1                                                                                                   | Blood and biochemical laboratory findings<br>Anti-P/Q-type voltage-gated calcium channel antibody positive                                                                                                                                             |
| 2                                                                                                   | Electrophysiological findings<br>Abnormality of repetitive nerve stimulation tests                                                                                                                                                                     |
| 1)                                                                                                  | Reduction of first complex muscle action potential (CMAP) amplitude                                                                                                                                                                                    |
| 2)                                                                                                  | Reduction of CMAP (waning) (> 10%) in low-frequency stimulation (2-5 Hz)                                                                                                                                                                               |
| 3)                                                                                                  | CMAP escalation (waxing) (1.6 times or more) after maximum muscle contraction for 10 seconds or after high-frequency stimulation (50 Hz)                                                                                                               |
| C                                                                                                   | Differential diagnosis<br>Differentiate the following diseases:<br>Myasthenia gravis, myositis, Guillain-Barre syndrome, chronic inflammatory demyelinating polyradiculoneuropathy, amyotrophic lateral sclerosis, botulism, organophosphate poisoning |
| Diagnosis criterion                                                                                 |                                                                                                                                                                                                                                                        |
| Definite                                                                                            | D1: Two or more items from A (one is necessary) + B1 + all B2 items, and diseases of C are excluded.<br>D2: Two or more items from A (one is necessary) + all B2 items, and diseases of C are excluded.                                                |
| Probable                                                                                            | Two or more items from A (one is necessary) + B1 + at least one from B2 and diseases of C are excluded.                                                                                                                                                |
| Diagnose as Lambert-Eaton myasthenic syndrome when patients satisfied Definite or Probable criteria |                                                                                                                                                                                                                                                        |

**S2 Table. The number of medical departments included in the survey**

| Department             | Total Number in Japan | Included in the Survey |
|------------------------|-----------------------|------------------------|
| Neurology              | 2024                  | 719                    |
| Internal Medicine      | 7419                  | 1544                   |
| Pediatrics             | 2468                  | 848                    |
| Surgery                | 4656                  | 1091                   |
| Neurosurgery           | 2384                  | 834                    |
| Respiratory Surgery    | 652                   | 397                    |
| Cardiovascular Surgery | 853                   | 476                    |
| Ophthalmology          | 2311                  | 852                    |
| Otolaryngology         | 1845                  | 784                    |
| <b>Total Number</b>    | <b>24812</b>          | <b>7545</b>            |

**S3 Table. The patient record for the second survey**

|                                                                                                                                                                                                                         |                                                                                                                |                                                 |
|-------------------------------------------------------------------------------------------------------------------------------------------------------------------------------------------------------------------------|----------------------------------------------------------------------------------------------------------------|-------------------------------------------------|
| Patient number [                      ]                                                                                                                                                                                 |                                                                                                                |                                                 |
| Initial _ : _<br>(optional)                                                                                                                                                                                             | Sex: 1. Male 2. Female                                                                                         | Birthday:<br>Age:                      year-old |
| Residence                                                                                                                                                                                                               | At birth: (                      )                                                                             | Current: (                      )               |
| Estimated onset year and month:                                                                                                                                                                                         |                                                                                                                | First consultation date:                        |
| Confirmed diagnosis date:                                                                                                                                                                                               |                                                                                                                | Medical institution diagnosed:                  |
| Clinical symptoms                                                                                                                                                                                                       |                                                                                                                |                                                 |
| Initial symptoms: 1. Proximal muscle weakness, 2. Autonomic symptoms, 3. Attenuation of deep tendon reflex, 4 Others (                      )                                                                           |                                                                                                                |                                                 |
| Current symptoms: 1. Proximal muscle weakness, 2. Autonomic symptoms, 3. Attenuation of deep tendon reflex, 4 Others (                      )                                                                           |                                                                                                                |                                                 |
| Cerebellar symptoms: 1. Yes, 2. No                                                                                                                                                                                      |                                                                                                                |                                                 |
| Current living situation 1. Working, 2. Go to school, 3. Domestic labor, 4. Home care, 5. Hospitalization, 6. Admission, 7. Others (                      )                                                             |                                                                                                                |                                                 |
| <b>Laboratory findings</b>                                                                                                                                                                                              |                                                                                                                |                                                 |
| Anti- P/Q-type voltage-gated calcium channel antibody                      1. Positive (                      pmol/L), 2. Negative, 3. Not tested, 4. Unknown                                                           |                                                                                                                |                                                 |
| Abnormality in repetitive nerve stimulation test                                                                                                                                                                        |                                                                                                                |                                                 |
| ① Decrease in the amplitude of the first complex muscle action potential (CMAP) 1. Positive, 2. Negative, 3. Not tested, 4. Unknown                                                                                     |                                                                                                                |                                                 |
| ② Gradual decrease phenomenon (waning) (> 10%) in low-frequency stimulation (2 to 5 Hz) 1. Positive, 2. Negative, 3. Not tested, 4. Unknown                                                                             |                                                                                                                |                                                 |
| ③ CMAP gradual increase phenomenon (waxing) (1.6 times or more) after maximum muscle contraction for 10 seconds or after high-frequency stimulation (20 to 50 Hz) 1. Positive, 2. Negative, 3. Not tested, 4. Unknown   |                                                                                                                |                                                 |
| History/complications (previous/complications observed throughout the course including before onset: ○, yes; ×, none; △, unknown)                                                                                       |                                                                                                                |                                                 |
| Autoimmune disease 1. Rheumatoid arthritis (                      ), 2. Hashimoto's disease (                      ), 3. Basedow's disease (                      ), 4. Systemic erythematosis (                      ) |                                                                                                                |                                                 |
| 5. Other autoimmune diseases (                      )                                                                                                                                                                   |                                                                                                                |                                                 |
| Surgical approach 1. Transsternal (a. Simple, b. Extended), 2. Video-assisted, 3. Others (                      ), 4. Unknown                                                                                           |                                                                                                                |                                                 |
| Neoplastic disease 1. Small cell lung carcinoma, (                      ) 2. Other cancers (type:)                                                                                                                      |                                                                                                                |                                                 |
| <b>Treatments performed so far</b> (Please circle all the treatment numbers and symbols and fill in the necessary information)                                                                                          |                                                                                                                |                                                 |
| 1. 3,4-DAP 2. ChE inhibitor 3. Oral steroids. Types of steroids (a. Prednisolone, b. Others:)                                                                                                                           |                                                                                                                |                                                 |
| Maximum dose (                      mg/day), current dose (                      mg/day) (in case of alternate-day administration, enter the average dose)                                                              |                                                                                                                |                                                 |
| 4. Immunosuppressive drug (                      ), current dose (                      mg / day)                                                                                                                       |                                                                                                                |                                                 |
| 5. Steroid pulse, 6. Blood purification therapy (a. Simple plasma exchange, b. Immunoabsorption method, c. Double membrane filtration method), 7. Intravenous immunoglobulin therapy                                    |                                                                                                                |                                                 |
| Family onset of Lambert-Eaton myasthenic syndrome 1. Yes (relationship:                      ), 2. No, 3. Unknown                                                                                                       |                                                                                                                |                                                 |
| Other autoimmune diseases 1. Yes (type:                      ) (relationship:                      ), 2. No, 3. Unknown.                                                                                                |                                                                                                                |                                                 |
| Outcome/<br>Prognosis                                                                                                                                                                                                   | Length of hospital stay: _____ months                                                                          |                                                 |
|                                                                                                                                                                                                                         | Final condition: after _____ months of onset, modified Rankin Scale: 0, 1, 2, 3, 4, 5, 6                       |                                                 |
|                                                                                                                                                                                                                         | Exacerbation: 1. Yes, 2. No, Death: 1. Yes, 2. No, Cause of death: 1. LEMS, 2. Others (                      ) |                                                 |

**S4 Table. Comparison of frequencies of initial and current symptoms**

|                                       | Initial symptom<br>n = 30 | Current symptom<br>n = 30 | p-value (Fisher's exact test) |
|---------------------------------------|---------------------------|---------------------------|-------------------------------|
| Proximal muscle weakness, n (%)       | 27 (90.0)                 | 24 (80.0)                 | 0.0936                        |
| Autonomic nervous symptom, n (%)      | 3 (10.0)                  | 7 (23.3)                  | 0.1276                        |
| Decreased deep tendon reflexes, n (%) | 6 (20.0)                  | 12 (40.0)                 | 0.6599                        |
